# Supplementary material
Source: PubMed Central journal article supplement (PMC1369202)
Supplement: 7400535-s1.pdf [file 7400535-s1.pdf]

Supplement: PTO-stimulated cellular uptake as a function of cell harvest: scraping (s) or trypsin treatment (t), respectively.

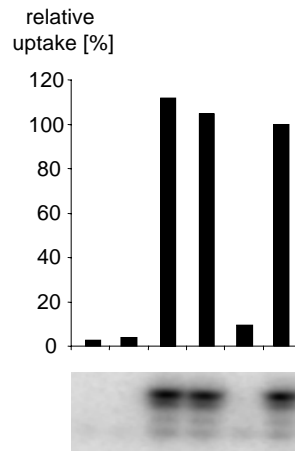

|                              |   |   |   |   |   |   |
|------------------------------|---|---|---|---|---|---|
| siRNA                        | + | + | + | + | + | + |
| PTO                          | - | - | + | + | - | + |
| mode of cell isolation (s/t) | s | s | s | s | t | t |
